# Supplementary material
Source: PubMed Central journal article supplement (PMC8869797)
Supplement: NIHMS1774358-supplement-2.pdf [file NIHMS1774358-supplement-2.pdf]

## Supplemental reference list

45. Haynes BC, Maier EJ, Kramer MH, Wang PI, Brown H and Brent MR. Mapping functional transcription factor networks from gene expression data. *Genome Res.* 2013;23:1319-28.
46. Xia J, Benner MJ and Hancock RE. NetworkAnalyst--integrative approaches for protein-protein interaction network analysis and visual exploration. *Nucleic Acids Res.* 2014;42:W167-74.
47. Han JD, Bertin N, Hao T, Goldberg DS, Berriz GF, Zhang LV, Dupuy D, Walhout AJ, Cusick ME, Roth FP et al. Evidence for dynamically organized modularity in the yeast protein-protein interaction network. *Nature.* 2004;430:88-93.
48. Shannon P, Markiel A, Ozier O, Baliga NS, Wang JT, Ramage D, Amin N, Schwikowski B and Ideker T. Cytoscape: a software environment for integrated models of biomolecular interaction networks. *Genome Res.* 2003;13:2498-504.
49. Paul S, Sidney J, Sette A and Peters B. TepiTool: A Pipeline for Computational Prediction of T Cell Epitope Candidates. *Curr Protoc Immunol.* 2016;114:18 19 1-18 19 24.
50. Zhou P, Jin B, Li H and Huang SY. HPEPDOCK: a web server for blind peptide-protein docking based on a hierarchical algorithm. *Nucleic Acids Res.* 2018;46:W443-W450.
